# Supplementary material for: Taking TiF4 complexes to extremes - the first examples with phosphine co-ligands
Source: Royal Society of Chemistry journal article supplement (doi:10.1039/c0dt00747a), 2010-01-01
Supplement: c0dt00747a.pdf [file c0dt00747a.pdf]

## Electronic Supplementary Information

### Taking TiF<sub>4</sub> complexes to extremes – the first examples with phosphine co-ligands

Marek Jura, William Levason, Edmund Petts, Gillian Reid, Michael Webster and Wenjian Zhang

#### Synthesis of N- and O-donor ligand complexes

##### Experimental

**[TiF<sub>4</sub>(2,2'-bipy)]:** [TiF<sub>4</sub>(thf)<sub>2</sub>] (0.265 g, 1.0 mmol) was dissolved in CH<sub>2</sub>Cl<sub>2</sub> (5 mL) and a solution of 2,2'-bipyridyl (0.155 g, 1.0 mmol) in CH<sub>2</sub>Cl<sub>2</sub> (5 mL) added via a syringe. The solution was stirred for 30 min, concentrated to ~5 mL and refrigerated overnight. The white solid which deposited was filtered off and dried *in vacuo*. Yield: 0.13 g, 46%. Required for C<sub>10</sub>H<sub>8</sub>F<sub>4</sub>N<sub>2</sub>Ti (280.1): C, 42.9; H, 2.9; N, 10.0. Found: C, 42.6; H, 2.7; N, 9.8%. <sup>1</sup>H NMR (CD<sub>2</sub>Cl<sub>2</sub>): δ 7.65 (m) [2H], 8.15 (m) [4H], 8.65 (t) [2H]. <sup>19</sup>F{<sup>1</sup>H} NMR (CH<sub>2</sub>Cl<sub>2</sub>) 293 K: 207.7 (s) [2F], 140.3 (s) [2F]; 223 K: 204.3 (t) [2F], 136.9 (t) [2F] <sup>2</sup>J<sub>FF</sub> = 35 Hz. IR (Nujol/cm<sup>-1</sup>): 664, 622, 592, 560 ν(TiF). UV/vis (diffuse reflectance) E<sub>max</sub>/cm<sup>-1</sup>: 38700, 30700(sh). Small colourless crystals were grown by refrigerating (260 K) the filtrate, and also by vapour diffusion of diethyl ether into a CH<sub>2</sub>Cl<sub>2</sub> solution of the complex. The following complexes were made similarly.

**[TiF<sub>4</sub>(1,10-phen)]:** White powder. Yield: 56%. Required for C<sub>12</sub>H<sub>8</sub>F<sub>4</sub>N<sub>2</sub>Ti (304.1): C, 47.4; H, 2.7; N, 9.2. Found: C, 47.6; H, 2.5; N, 9.6%. <sup>1</sup>H NMR (CD<sub>2</sub>Cl<sub>2</sub>): δ 7.63 (m) [2H], 7.85 (s) [2H], 8.25 (dd) [2H], 9.19 (t) [2H]. <sup>19</sup>F{<sup>1</sup>H} NMR (CH<sub>2</sub>Cl<sub>2</sub>) 293 K: 210.4 (s) [2F], 141.6 (s)

[2F]; 243 K: 208.2 (t) [2F], 140.1 (t) [2F]  $^2J_{\text{FF}} = 33$  Hz. IR (Nujol/cm<sup>-1</sup>): 645, 618, 569 TiF. UV/vis (diffuse reflectance)  $E_{\text{max}}/\text{cm}^{-1}$ : 38600, 33000(sh).

**Cis-[TiF<sub>4</sub>(py)<sub>2</sub>]:** White powder. Yield: 60%. Required for C<sub>10</sub>H<sub>10</sub>F<sub>4</sub>N<sub>2</sub>Ti (282.1): C, 42.6; H, 3.6; N, 9.9. Found: C, 43.4; H, 3.7; N, 10.1%. <sup>1</sup>H NMR (CD<sub>2</sub>Cl<sub>2</sub>): δ 7.45 (s) [2H], 7.90 (s) [H], 8.93 (s) [2H]. <sup>19</sup>F{<sup>1</sup>H}NMR (CH<sub>2</sub>Cl<sub>2</sub>) 293 K: 218.3 (s) [2F], 150.8 (s) [2F]; 243 K: 213.8 (t) [2F], 151.6 (t) [2F]  $^2J_{\text{FF}} = 28$  Hz. IR (Nujol/cm<sup>-1</sup>): 654, 638, 631, 570 v(TiF). UV/vis (diffuse reflectance)  $E_{\text{max}}/\text{cm}^{-1}$ : 38600, 33000(sh).

**[TiF<sub>4</sub>{Me<sub>2</sub>N(CH<sub>2</sub>)<sub>2</sub>NMe<sub>2</sub>}]**: The reaction solution was filtered and then reduced to dryness *in vacuo* and the white residue washed with diethyl ether. Yield: 75%. Required for C<sub>6</sub>H<sub>16</sub>F<sub>4</sub>N<sub>2</sub>Ti (240.1): C, 30.0; H, 6.7; N, 11.7. Found: C, 30.1; H, 7.0; N, 11.3%. <sup>1</sup>H NMR (CD<sub>2</sub>Cl<sub>2</sub>): δ 2.71 (s) [3H], 2.80 (s) [H]. <sup>19</sup>F{<sup>1</sup>H} NMR (CH<sub>2</sub>Cl<sub>2</sub>) 293 K: 199.1 (t) [2F], 145.2 (t) [2F]  $^2J_{\text{FF}} = 37$  Hz. IR (Nujol/cm<sup>-1</sup>): 630, 604(br) v(TiF). UV/vis (diffuse reflectance)  $E_{\text{max}}/\text{cm}^{-1}$ : 45500, 35700(sh).

**Cis-[TiF<sub>4</sub>(pyNO)<sub>2</sub>]:** White powder. Yield: 75%. Required for C<sub>10</sub>H<sub>10</sub>F<sub>4</sub>N<sub>2</sub>O<sub>2</sub>Ti (314.1): C, 38.2; H, 3.2; N, 8.9. Found: C, 38.0; H, 2.6; N, 8.7%. <sup>1</sup>H NMR (CD<sub>2</sub>Cl<sub>2</sub>): δ 7.40 (s) [2H], 8.23 (br) [3H]. <sup>19</sup>F{<sup>1</sup>H} NMR (CH<sub>2</sub>Cl<sub>2</sub>) 293 K: 170.7 (s) [2F], 136.9 (s) [2F]; 223 K: 162.4 (t) [2F], 134.2 (t) [2F]  $^2J_{\text{FF}} = 35$  Hz. IR (Nujol/cm<sup>-1</sup>): 1223, 1208 v(NO), 630, 580(br) v(TiF). UV/vis (diffuse reflectance)  $E_{\text{max}}/\text{cm}^{-1}$ : 45500, 40000, 33000(sh).

**Cis-[TiF<sub>4</sub>(Ph<sub>3</sub>PO)<sub>2</sub>]:** Colourless crystals. Yield: 56%. Required for C<sub>36</sub>H<sub>30</sub>F<sub>4</sub>O<sub>2</sub>P<sub>2</sub>Ti (680.5): C, 63.6; H, 4.4. Found: C, 62.9; H, 3.9%. <sup>1</sup>H NMR (CD<sub>2</sub>Cl<sub>2</sub>): δ 7.3–7.7 (m). <sup>19</sup>F{<sup>1</sup>H} NMR (CH<sub>2</sub>Cl<sub>2</sub>) 293 K: 200.7 (s) [2F], 140.7 (s) [2F]; 243 K: 195.7 (t) [2F], 137.9 (t) [2F]  $^2J_{\text{FF}} = 38$

Hz.  $^{31}\text{P}\{^1\text{H}\}$  NMR ( $\text{CH}_2\text{Cl}_2$ ) 293 K: 40.2 (s); 200 K: 41.7 (s). IR (Nujol/ $\text{cm}^{-1}$ ): 1152, 1067  $\nu(\text{PO})$ , 640, 620, 596  $\nu(\text{TiF})$ . UV/vis (diffuse reflectance)  $E_{\text{max}}/\text{cm}^{-1}$ : 43100, 38500. Crystals were obtained directly from the reaction filtrate after isolating the bulk material.

***Cis*-[TiF<sub>4</sub>(Me<sub>3</sub>PO)<sub>2</sub>]**: Colourless powder. Yield: 73%. Required for C<sub>6</sub>H<sub>18</sub>F<sub>4</sub>O<sub>2</sub>P<sub>2</sub>Ti (308.0): C, 23.4; H, 5.9. Found: C, 22.6; H, 6.2%.  $^1\text{H}$  NMR ( $\text{CD}_2\text{Cl}_2$ ):  $\delta$  2.15 (s).  $^{19}\text{F}\{^1\text{H}\}$  NMR ( $\text{CH}_2\text{Cl}_2$ ) 293 K: 188.2 (s) [2F], 127.4 (s) [2F]; 243 K: 179.5 (t) [2F], 127.5 (t) [2F]  $^2J_{\text{FF}} = 38$  Hz.  $^{31}\text{P}\{^1\text{H}\}$  NMR ( $\text{CH}_2\text{Cl}_2$ ) 293 K: 63.1 (s). IR (Nujol/ $\text{cm}^{-1}$ ): 1155(m), 1075(br)  $\nu(\text{PO})$ , 640(sh), 620, 580  $\nu(\text{TiF})$ . UV/vis (diffuse reflectance)  $E_{\text{max}}/\text{cm}^{-1}$ : 44100, 38600.

***Cis*-[TiF<sub>4</sub>(Ph<sub>3</sub>AsO)<sub>2</sub>]**: Colourless crystals. Yield: 59%. Required for C<sub>36</sub>H<sub>30</sub>As<sub>2</sub>F<sub>4</sub>O<sub>2</sub>Ti·CH<sub>2</sub>Cl<sub>2</sub> (853.3): C, 52.1; H, 3.8. Found: C, 51.7; H, 3.7%.  $^1\text{H}$  NMR ( $\text{CD}_2\text{Cl}_2$ ):  $\delta$  7.3–7.7 (m).  $^{19}\text{F}\{^1\text{H}\}$  NMR ( $\text{CH}_2\text{Cl}_2$ ) 293 K: 160.8 (t) [2F], 121.2 (t) [2F]  $^2J_{\text{FF}} = 35$  Hz. IR (Nujol/ $\text{cm}^{-1}$ ): 845(br)  $\nu(\text{AsO})$ , 640(sh), 616, 595, 570  $\nu(\text{TiF})$ . UV/vis (diffuse reflectance)  $E_{\text{max}}/\text{cm}^{-1}$ : 45500, 36400. Crystals were grown by vapour diffusion of diethyl ether into a CH<sub>2</sub>Cl<sub>2</sub> solution of the complex.

**[TiF<sub>4</sub>{Ph<sub>2</sub>P(O)CH<sub>2</sub>P(O)Ph<sub>2</sub>}]**: Colourless crystals. Yield: 48%. Required for C<sub>25</sub>H<sub>22</sub>F<sub>4</sub>O<sub>2</sub>P<sub>2</sub>Ti (540.3): C, 55.6; H, 4.1. Found: C, 55.2; H, 4.2%.  $^1\text{H}$  NMR ( $\text{CD}_2\text{Cl}_2$ ):  $\delta$  7.3–7.7 (m), 5.2 (s,br).  $^{19}\text{F}\{^1\text{H}\}$  NMR ( $\text{CH}_2\text{Cl}_2$ ) 293 K: 218.8 (t) [2F], 135.7 (t) [2F]  $^2J_{\text{FF}} = 35$  Hz.  $^{31}\text{P}\{^1\text{H}\}$  NMR ( $\text{CH}_2\text{Cl}_2$ ) 293 K: 40.1 (s). IR (Nujol/ $\text{cm}^{-1}$ ): 1156, 1100  $\nu(\text{PO})$ , 657, 639, 622, 600(sh)  $\nu(\text{TiF})$ . UV/vis (diffuse reflectance)  $E_{\text{max}}/\text{cm}^{-1}$ : 45000, 39100, 36400(sh).
